# Supplementary material for: Nanoparticle-aggregated hollow copper microcages and their surface-enhanced Raman scattering activity
Source: Royal Society of Chemistry journal article supplement (doi:10.1039/c3ce40703a), 2013-01-01
Supplement: c3ce40703a.pdf [file c3ce40703a.pdf]

## Electronic Supplementary Information

### Nanoparticle-Aggregated Hollow Copper Microcages and their Surface-Enhanced Raman Scattering Activity

Chuncaai Kong,<sup>‡</sup> Shaodong Sun,<sup>‡</sup> Xiaozhe Zhang, Xiaoping Song and Zhimao Yang\*

*School of Science, MOE Key Laboratory for Non-Equilibrium Synthesis and Modulation of Condensed Matter,*

*State Key Laboratory for Mechanical Behavior of Materials, Xi'an Jiaotong University, Xi'an 710049, ShaanXi,*

*People's Republic of China*

\*Author to whom correspondence should be addressed; E-mail: zmyang@mail.xjtu.edu.cn

‡These authors contributed equally to this work.

### Experimental Section

All chemicals used in our experiment were of analytical grade and used without further purification.

**Synthesis of 26-facet Cu<sub>2</sub>O crystals.** In a typical procedure for the synthesis of 26-facet Cu<sub>2</sub>O crystals,<sup>1, 2</sup> 2.9946 g of Cu(CH<sub>3</sub>COO)<sub>2</sub>•H<sub>2</sub>O was dissolved in 50 mL deionized water using a beaker under constant stirring at 70 °C for 5 min. A dark precipitate was produced when 30 mL of NaOH (3.6 g) aqueous solution was added dropwise to the above solution. After being stirred for 5 min, 0.6 g of glucose powder was added into the dark precursor with constant stirring for another 30 min at 70 °C. Then, the obtained red particles were cleaned with deionized water and ethanol by repeated centrifugation, and dried at 70 °C for 12 h in a vacuum oven. Thus, polyhedral 26-facet Cu<sub>2</sub>O crystals were prepared.

**Synthesis of hollow copper microcages.** The hollow copper microcages were synthesized as follows: 0.012 g of 26-facet  $\text{Cu}_2\text{O}$  crystals were dispersed in 30 mL ethylene glycol (EG) in a conical flask, after the mixture was stirred for 10 min in a water bath at 60 °C, 10 mL of NaOH aqueous solution (5 M) was added dropwise. 5 min later, 10 mL of glucose aqueous solution (1.1 M) was added into the above solution. The reaction was kept at 60 °C for 120 min. Afterwards, the product was cleaned with deionized water and ethanol by repeated centrifugation. Thus, the hollow copper microcages were obtained and kept in ethanol for further characterization.

**Characterization.** The crystal phase of the as-prepared product was characterized by an X-ray diffractometer (Bruker-AXS D8 ADVANCE) using Cu-K $\alpha$  radiation ( $\lambda = 1.54$  Å) in the range (20–80°). The morphology of the samples was investigated by field-emission scanning electron microscopy (FESEM) using JEOL (JSM-7000F). The transmission electron microscopy (TEM) and high resolution transmission electron microscopy (HRTEM) analysis as well as selected-area electron diffraction (SAED) pattern analysis were performed on a JEOL JEM-2100 transmission electron microscope operating at an accelerating voltage of 200 kV. Thermalgravimetric analysis (TGA) of the production was carried out on a STA 449C (NETZSCH) simultaneous thermogravimetric/differential thermal analyzer under Ar and O<sub>2</sub> atmosphere, respectively. The range of temperature was from 30 °C to 600 °C with heating rate of 10 °C min<sup>-1</sup>.

**Surface-enhanced Raman spectra:** SERS of the as-prepared products were acquired using an HR 800 Raman spectrometer (HORIBA JOBIN YVON) with a CCD detector

and He-Ne laser (633 nm). The SERS spectra were collected at 100x objective and an accumulation time of 5 s. In addition, the grating was  $600 \text{ g mm}^{-1}$  and the filter in the SERS spectra was D1. The as-prepared Cu hollow hierarchical architectures were added into 2 ml of R6G or 4-mercaptobenzoic acid ethanol solution with different concentration. The solutions were sonicated for 3 min and left undisturbed for another 2 h, 20  $\mu\text{l}$  of the solution dropped on a silicon substrate and then dried for SERS measurements.

The enhancement factor (EF) was calculated following the Equation:<sup>3</sup>

$$\text{EF} = I_{\text{SERS}}C_0 / (I_0C_{\text{SERS}})$$

where  $C_{\text{SERS}}$  and  $I_{\text{SERS}}$  are the concentration and peak intensity of Raman under SERS conditions.  $C_0$  and  $I_0$  are the concentration and peak intensity of the normal Raman measurement, with R6G ethanol solution of  $10^{-1} \text{ M}$  on a Si wafer. The EF was calculated based on the peak at  $1364 \text{ cm}^{-1}$ , according to the equation, the EF was calculated to be  $0.6 \times 10^5$ ,  $0.96 \times 10^5$ , and  $1.9 \times 10^5$  according to the R6G concentrations of  $10^{-5} \text{ M}$ ,  $10^{-6} \text{ M}$  and  $10^{-7} \text{ M}$  respectively.

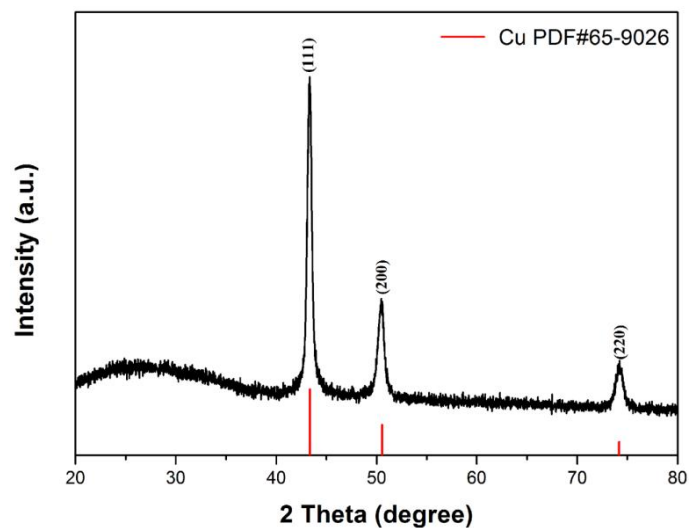

**Fig. S1** XRD pattern of the as-prepared products.

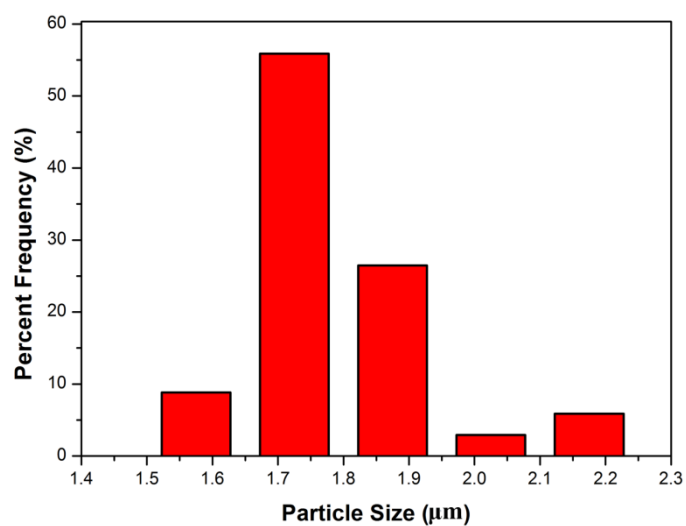

**Fig. S2** The size-distribution diagram of as-prepared products.

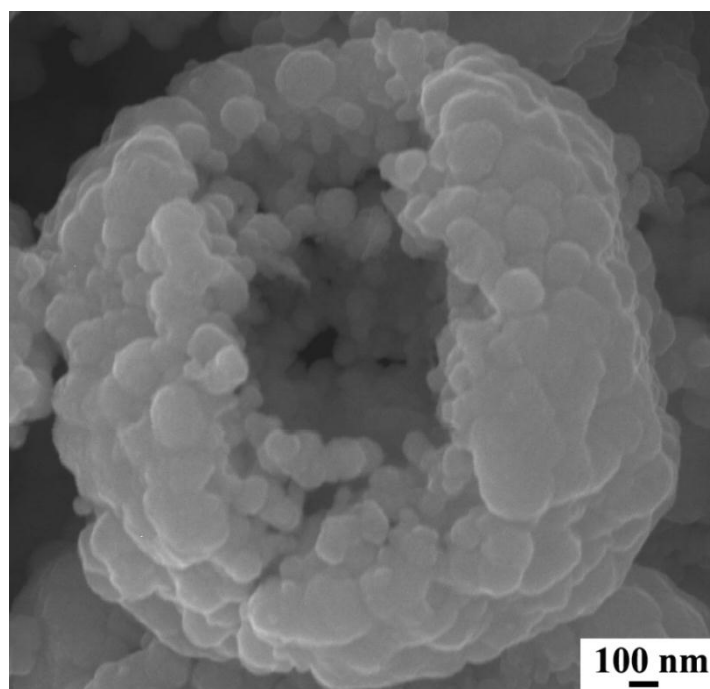

**Fig. S3** FESEM image of the broken as-prepared products.

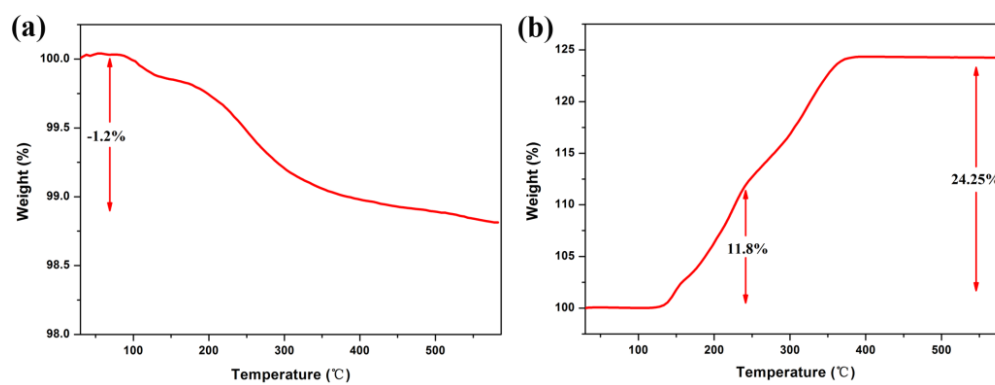

**Fig. S4** TGA curve of hollow Cu microcages in different atmosphere: (a) Ar and (b) O<sub>2</sub>.

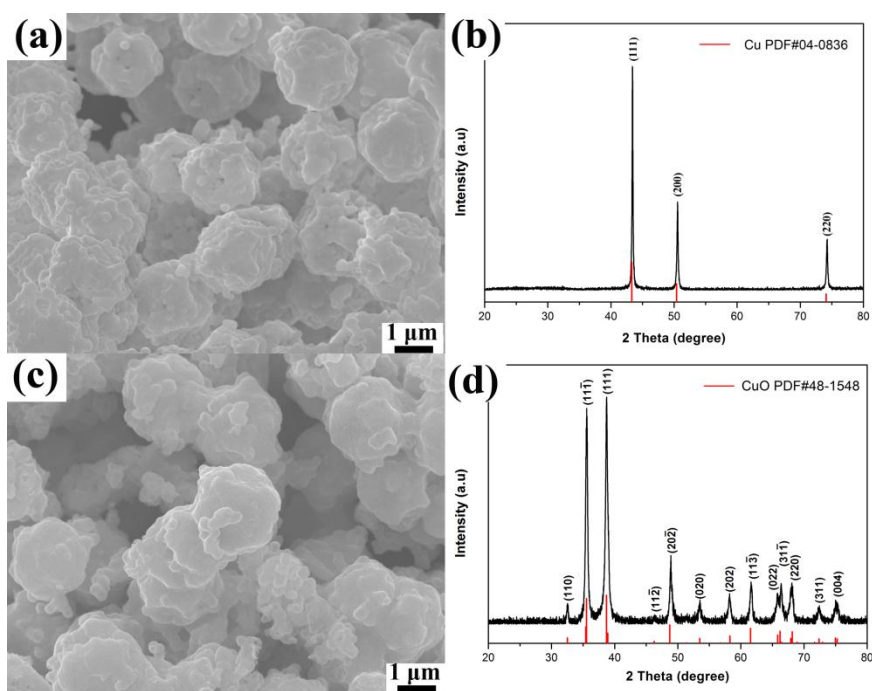

**Fig. S5** (a) SEM and (b) XRD of the hollow Cu microcages after measurement of TGA in Ar; (c) SEM and (d) XRD of the hollow Cu microcages after measurement of TGA in O<sub>2</sub>.

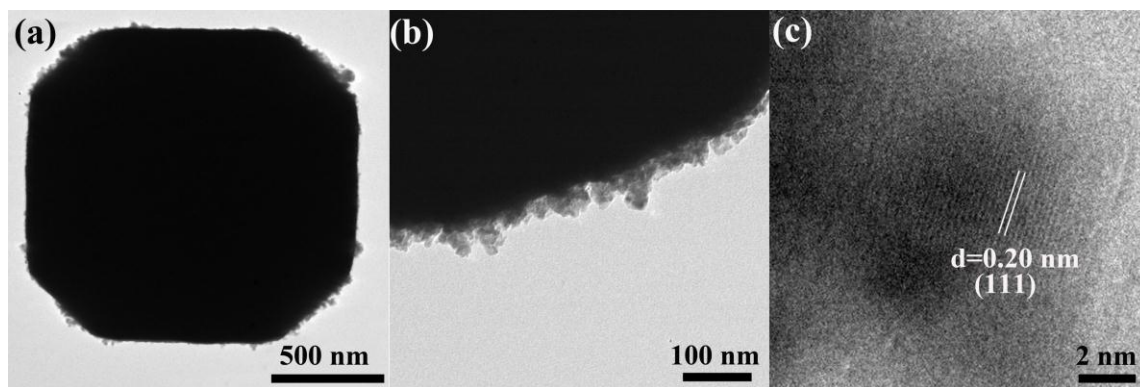

**Fig. S6** TEM and HRTEM images of products obtained at 5 min.

1. S. D. Sun, X. P. Song, C. C. Kong, S. H. Liang, B. J. Ding and Z. M. Yang, *CrystEngComm*, 2011, **13**, 6200-6205.
2. S. D. Sun, F. Y. Zhou, L. Q. Wang, X. P. Song and Z. M. Yang, *Crys. Growth Des.*, 2009, **10**, 541-547.
3. Q. Shao, R. H. Que, M. W. Shao, L. Cheng and S. T. Lee, *Adv. Funct. Mater.*, 2012, **22**, 2067-2070.
